# Supplementary material for: Magnetron sputtering of platinum on nitrogen-doped polypyrrole carbon nanotubes as an efficient and stable cathode for lithium–carbon dioxide batteries
Source: Royal Society of Chemistry journal article supplement (doi:10.1039/d3cp00116d), 2023-01-01
Supplement: d3cp00116d1.pdf [file d3cp00116d1.pdf]

### Supplementary Information

#### Magnetron sputtering platinum on nitrogen-doped polypyrrole carbon nanotubes as an efficient and stable cathode for lithium-carbon dioxide batteries

Zhaoyong Chen<sup>a, b</sup>, Mengming Yuan<sup>a</sup>, Zhuolin Tang<sup>a</sup>, Huali Zhu<sup>a, b</sup>, Guang Zeng<sup>a, b, \*</sup>

<sup>a</sup>School of Materials Science and Engineering, Changsha University of Science and Technology, Changsha, Hunan 410114, China

<sup>b</sup>Institute of New Energy and Power Battery, Changsha University of Science and Technology, Changsha, Hunan 410114, China

\* E-mail: zengguang@csust.edu.cn (Guang Zeng);

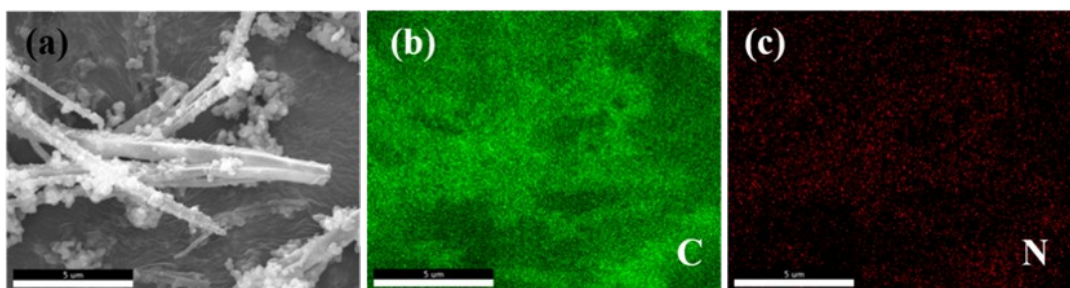

Figure S1 EDX mapping of C and N for the selected area of NPPy-CNTs.

Table S1 Chemical composition from EDS analysis carried out on NPPy-CNTs.

| Element | Weight % | Atomic % |
|---------|----------|----------|
| C       | 93.8     | 94.6     |
| N       | 6.2      | 5.4      |

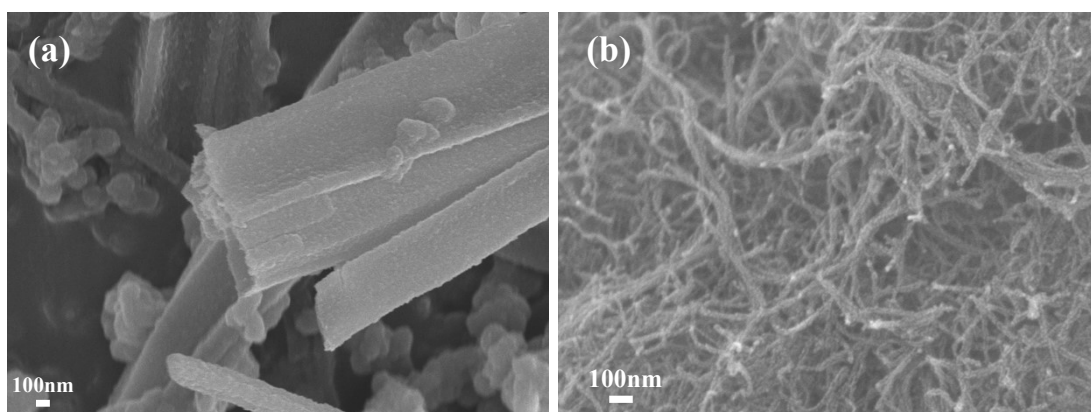

Figure S2 The SEM images of Pt-NPPy-CNTs (a) and commercial CNTs (b).

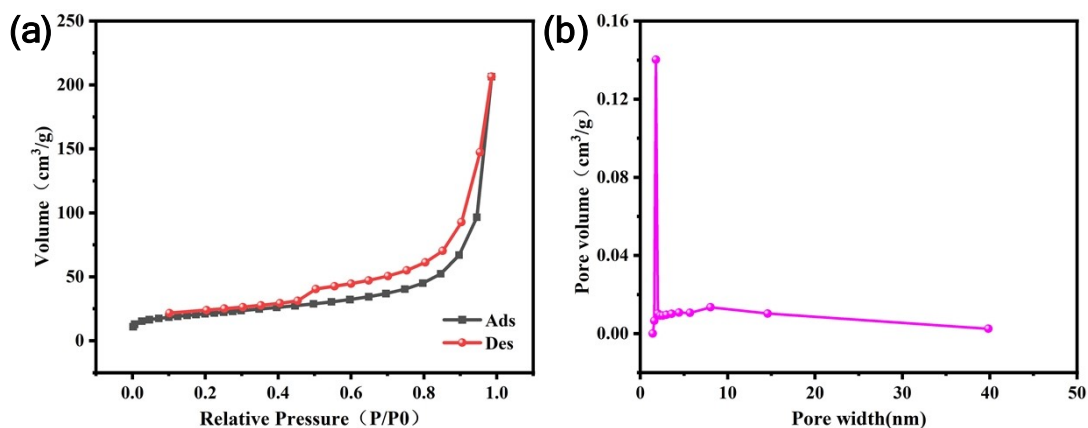

Figure S3 (a)  $N_2$  adsorption and desorption curve of NPPy-CNTs; (b) pore size distribution diagram of NPPy-CNTs.

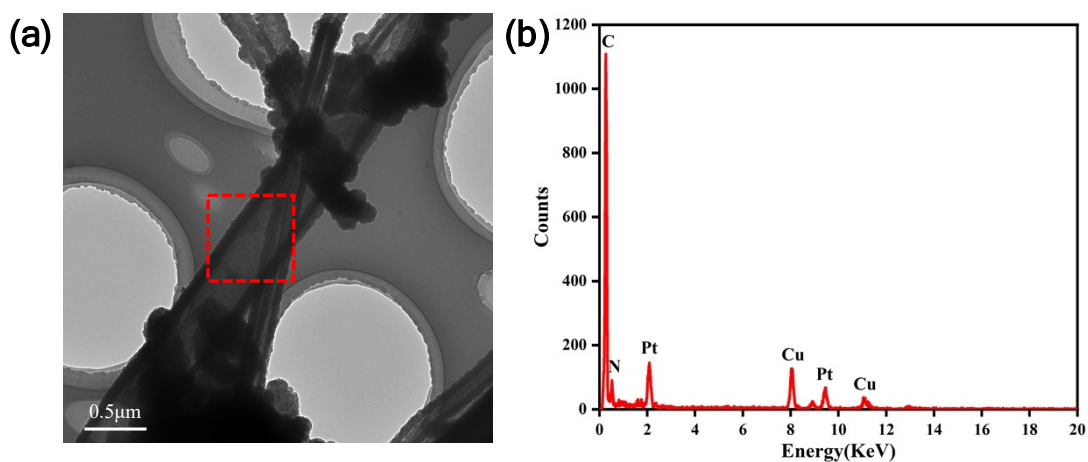

Figure S4 TEM and EDX images of Pt-NPPy-CNTs.

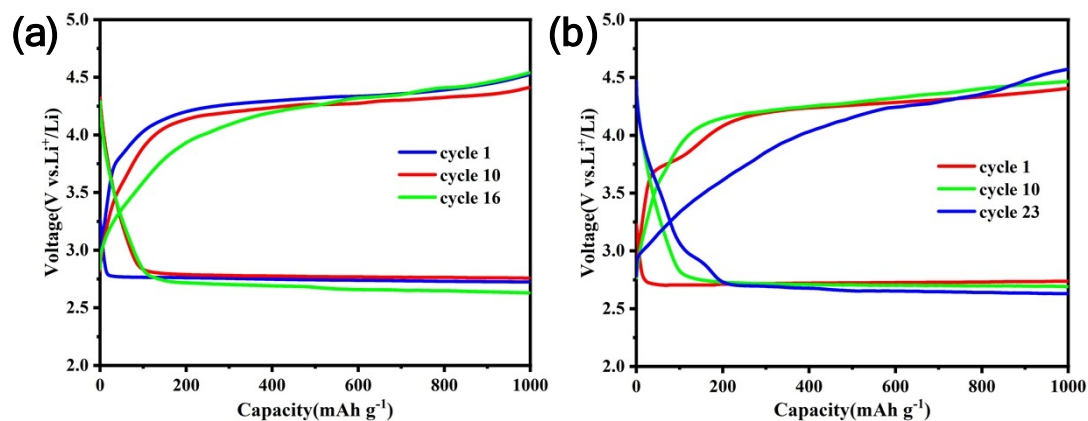

Figure S5 The charge-discharge cycle curves of Li- $CO_2$  batteries with different catalysts at a current density of  $100\text{mA g}^{-1}$  and a cut-off capacity of  $1000\text{mAh g}^{-1}$ : (a) Commercial CNTs; (b) NPPy-CNTs.

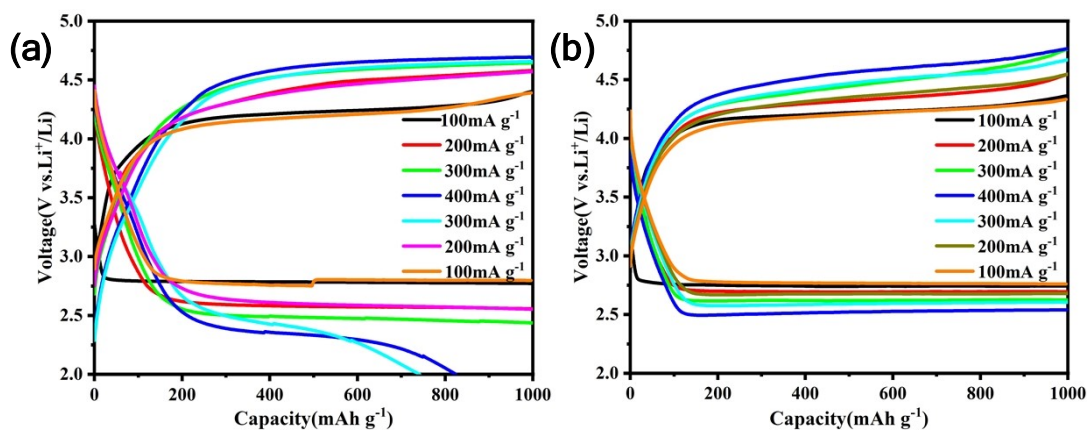

Figure S6 Charge and discharge curves of Li-CO<sub>2</sub> batteries with different catalysts at different current densities and cut-off capacities of 1000mAh g<sup>-1</sup>: (a) Commercial CNTs; (b) NPPy-CNTs.

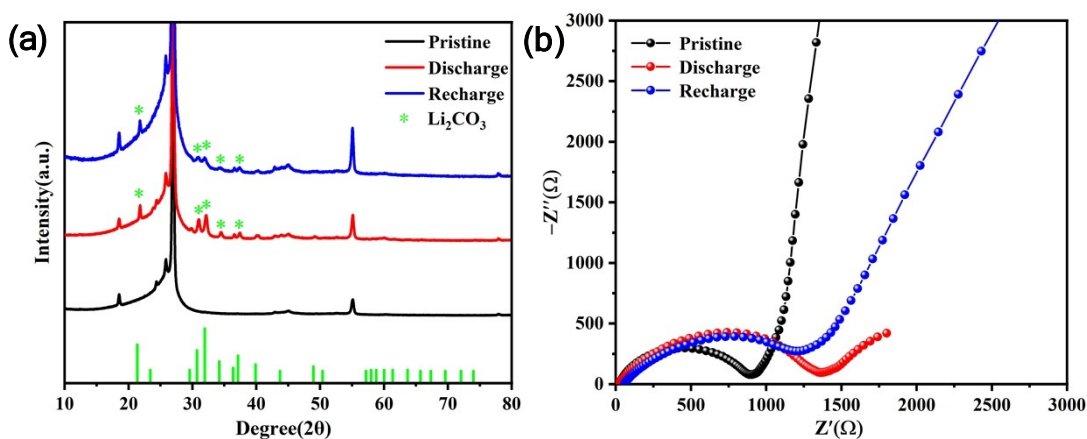

Figure S7 Commercial CNTs cathodes in different charge and discharge stages: (a) Ex-situ XRD pattern; (b) ex-situ EIS map.

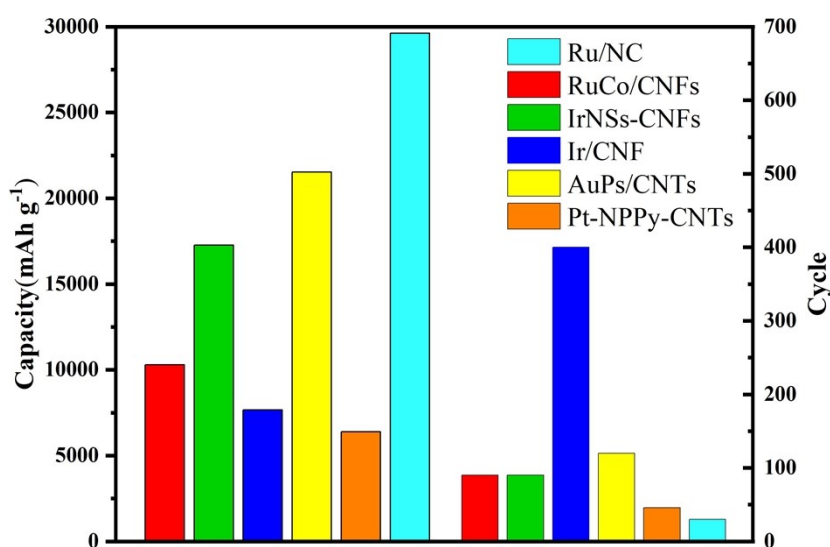

Figure S8 Comparison of discharge specific capacity and cycle performance of different noble metal doped carbon materials as cathode catalyst of Li-CO<sub>2</sub> batteries.<sup>1-7</sup>

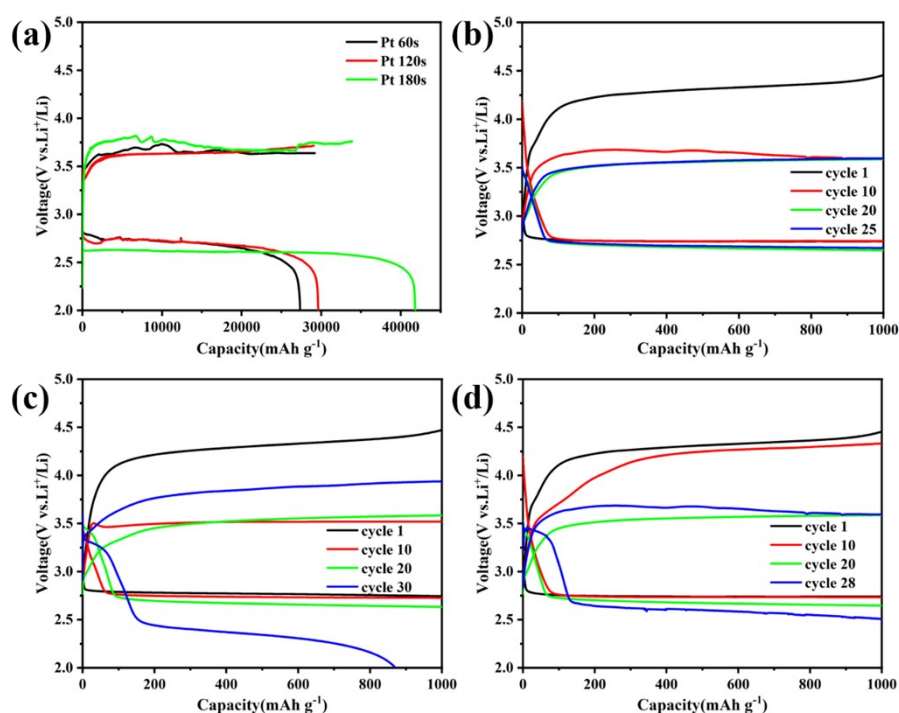

Figure S9 (a) First complete charge-discharge diagram of Pt-NPPy-CNTs with different magnetron sputtering time at  $100 \text{ mA g}^{-1}$  current density; charge-discharge cycles of Pt-NPPy-CNTs with different magnetron sputtering time at  $100 \text{ mA g}^{-1}$  current density and  $1000 \text{ mAh g}^{-1}$  cut-off capacity: (b) 60s; (c) 120s; (d) 180s.

1. S. Yang, Y. Qiao, P. He, Y. Liu, Z. Cheng, J.-J. Zhu and H. Zhou, *Energy & Environmental Science*, 2017, 10, 972-978.
2. Y. Jin, F. Chen, J. Wang, *ACS Sustainable Chemistry & Engineering*, 2020, 8(7): 2783-2792.
3. Y. Xing, Y. Yang, D. Li, M. Luo, N. Chen, Y. Ye, J. Qian, L. Li, D. Yang, F. Wu, R. Chen, S. Guo, *Advanced Materials*, 2018, 30(51): 1803124.
4. C. Wang, Q. Zhang, X. Zhang, X. G. Wang, Z. Xie, Z. Zhou, *Small*, 2018, 14(28): 1800641.
5. Y. Kong, H. Gong, L. Song, C. Jiang, T. Wang, J. He, *European Journal of Inorganic Chemistry*, 2021, 2021(6): 590-596.
6. F. Xiong, Y. Jiang, L. Cheng, R. Yu, S. Tan, C. Tang, C. Zuo, Q. An, Y. Zhao, J.-J. Gaumet and L. Mai, *Interdisciplinary Materials*, 2022, 1, 140-147.
7. C. Li, M. Qiu, R. Li, X. Li, M. Wang, J. He, G. Lin, L. Xiao, Q. Qian, Q. Chen, J. Wu, X. Li, Y.-W. Mai and Y. Chen, *Advanced Fiber Materials*, 2022, 4, 43-65.
